# Supplementary material for: Complementary activity of tyrosine kinase inhibitors against secondary kit mutations in imatinib-resistant gastrointestinal stromal tumours
Source: PubMed Central journal article supplement (PMC6462042; doi:10.1038/s41416-019-0389-6), 2019-02-22

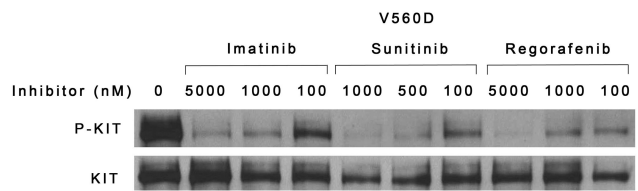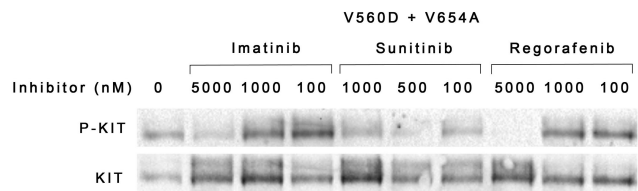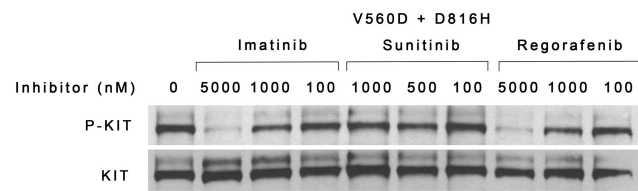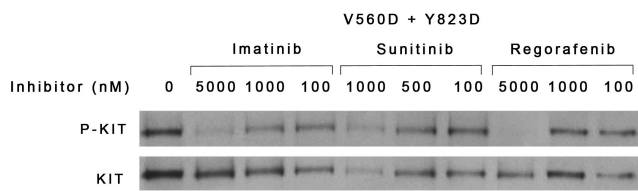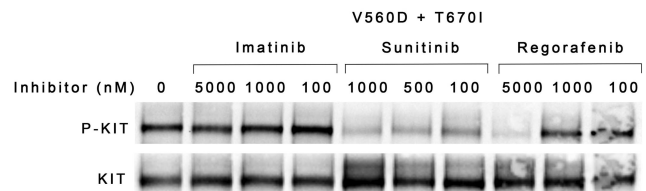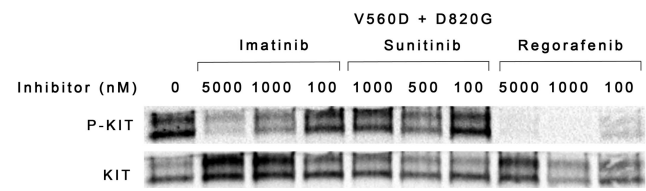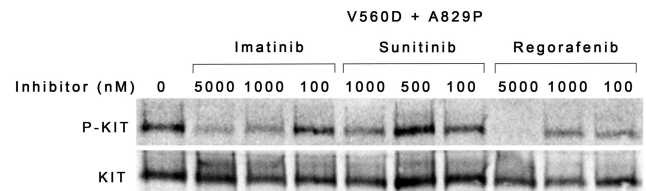

Supplement: 41416_2019_389_MOESM1_ESM.pdf [file 41416_2019_389_MOESM1_ESM.pdf]
